# Supplementary material for: Controlling the flexibility and single-crystal to single-crystal interpenetration reconstitution of metal–organic frameworks
Source: Royal Society of Chemistry journal article supplement (doi:10.1039/c5cc05036g), 2015-01-01
Supplement: c5cc05036g1.pdf [file c5cc05036g1.pdf]

**Electronic Supplementary Information (ESI) for**

**Controlling flexibility and single-crystal to single-crystal interpenetration reconstitution of metal-organic frameworks**

Dong-Dong Zhou, Zhi-Juan Liu, Chun-Ting He, Pei-Qin Liao, Hao-Long Zhou, Zhen-Song Zhong, Rui-Biao Lin, Wei-Xiong Zhang, Jie-Peng Zhang,\* and Xiao-Ming Chen

MOE Key Laboratory of Bioinorganic and Synthetic Chemistry, School of Chemistry and Chemical Engineering, Sun Yat-Sen University, Guangzhou 510275, P. R. China

\*E-mail: zhangjp7@mail.sysu.edu.cn

## Experimental details.

**Materials and General Methods.** Reagents and solvents were commercially available and used without further purification. Elemental analyses (C, H, N) were performed with a Vario EL elemental analyzer. Powder X-ray diffraction (PXRD) patterns were recorded using a Bruker D8 DISCOVER X-ray powder diffractometer (Cu K $\alpha$ ) at room temperature except otherwise stated. Thermogravimetry analyses were performed using a TA Q50 instrument with a heating rate of 5.0 °C/min under nitrogen. Water vapor sorption isotherms were measured with an automatic volumetric sorption apparatus (BELSORP-max, Bel Japan). Before the sorption experiments, the as-synthesized samples were placed in the sample tubes and dried under high vacuum at room temperature for 36 h. Variable-humidity PXRD patterns were recorded using a Bruker D8 DISCOVER powder diffractometer (Cu K $\alpha$ ) at room temperature, in which the relative humidity (RH) of the sample chamber was controlled by mixing a water saturated N<sub>2</sub> flow with a dry N<sub>2</sub> flow and determined by an AM2303 digital humidity & temperature sensor.

**Synthesis.** [Ag<sub>6</sub>Cl(atz)<sub>4</sub>]OH·6H<sub>2</sub>O (**1**).<sup>[1]</sup> 3-amino-1,2,4-triazole (Hatz, 0.168 g, 2 mmol) was added into an aqueous ammonia solution (25%, 50 mL) of AgCl (0.072 g, 0.50 mmol) and Ag<sub>2</sub>O (0.290 g, 1.25 mmol). The mixture was filtered to give a clear solution and placed in the dark to evaporate slowly. After one week, colorless needlelike crystals were filtered, washed by water and dried in the air (yield ca. 91%). Anal. Calcd (%) for [Ag<sub>6</sub>Cl(atz)<sub>4</sub>]OH·6H<sub>2</sub>O (C<sub>8</sub>H<sub>25</sub>Ag<sub>6</sub>ClN<sub>16</sub>O<sub>7</sub>): C, 8.43; H, 2.21; N, 19.66. Found: C, 8.83; H, 2.32; N, 19.28.

[Ag<sub>6</sub>Cl(mtz)<sub>4</sub>]OH·6H<sub>2</sub>O (**2**). The same reaction method for **1** was used except that Hatz was replaced by 3-methyl-1,2,4-triazole (Hmtz, 0.166 g, 2 mmol). Colorless needlelike crystal of **2** (yield ca. 94%) was obtained after one week. Anal. Calcd (%) for [Ag<sub>6</sub>Cl(mtz)<sub>4</sub>]OH·6H<sub>2</sub>O (C<sub>12</sub>H<sub>29</sub>Ag<sub>6</sub>ClN<sub>12</sub>O<sub>7</sub>): C, 12.69; H, 2.57; N, 14.79. Found: C, 12.66; H, 2.45; N, 14.76.

[Ag<sub>6</sub>Br(atz)<sub>4</sub>]OH·6H<sub>2</sub>O (**3**). The same reaction method for **1** was used except that AgBr (0.094 g, 0.50 mmol) instead of AgCl was dissolved in an aqueous ammonia solution (25%, 100 mL). Colorless needlelike crystal of **3** (yield ca. 92%) was obtained after one week. Anal. Calcd (%) for [Ag<sub>6</sub>Br(atz)<sub>4</sub>]OH·6H<sub>2</sub>O (C<sub>8</sub>H<sub>25</sub>Ag<sub>6</sub>BrN<sub>16</sub>O<sub>7</sub>): C, 8.11; H, 2.13; N, 18.92. Found: C, 8.56; H, 2.28; N, 18.61.

[Ag<sub>6</sub>Br(mtz)<sub>4</sub>]OH·6H<sub>2</sub>O (**4**). The same reaction method for **2** was used except that AgBr (0.094 g, 0.50 mmol) instead of AgCl was dissolved in an aqueous ammonia solution (25%, 100 mL). Colorless needlelike microcrystal of **4** (yield ca. 86%) was obtained after one week. Anal. Calcd (%) for Ag<sub>6</sub>Br(mtz)<sub>4</sub>]OH·6H<sub>2</sub>O (C<sub>12</sub>H<sub>29</sub>Ag<sub>6</sub>BrN<sub>12</sub>O<sub>7</sub>): C, 12.21; H, 2.48; N, 14.24. Found: C, 12.69; H, 2.30; N, 14.14.

The dehydrated structures of **1–4**, namely **1'–4'**, were obtained in a dryer equipped with silica gel or a very slow stream of dry air for about 10 h.

**Crystal Structure Determination.** Diffraction intensities of the compounds were collected on a Bruker Apex and an Oxford Diffraction CCD diffractometer with graphite-monochromated Mo K $\alpha$  radiation ( $\lambda = 0.71073$  Å). Absorption corrections were applied by using the multi-scan program SADABS and PROCESS-AUTO. The structures were solved with the direct method and refined with a full-matrix least-squares technique with the SHELXTL program package. Anisotropic thermal parameters were applied to all non-hydrogen host-framework atoms. The hydrogen atoms were generated geometrically. Crystal data as well as details of data collection and refinements for the complexes are summarized in Table S1. CCDC 1404331-1404338 contain the supplementary crystallographic data for this paper. These data can be obtained free of charge from The Cambridge Crystallographic Data Centre via [www.ccdc.cam.ac.uk/data\\_request/cif](http://www.ccdc.cam.ac.uk/data_request/cif).

**Computer Simulations.** All our simulations were furnished by the Materials Studio 5.0 package. Firstly, the models of the host frameworks were constructed from the single-crystal structures of **1–4**, but the amino/methyl groups were considered to be ordered by decreasing the crystal symmetries from  $I4_1/amd$  to  $I4_1/a$ , and the positions of the hydrogen atoms were optimized through molecular mechanics (MM) in the Forcite module. Then the preferential sorption sites of OH<sup>−</sup>/H<sub>2</sub>O in the frameworks were simulated by grand canonical Monte Carlo (GCMC) plus simulated annealing with fixed loading operations through the universal forcefield (UFF). The simulation box consisted of one unit cell and 1 H<sub>2</sub>O and 1 OH<sup>−</sup> were fixed to load in the pores of each framework. Rigid models and the QEq partial charges were adopted to the framework, while the guest molecules were allowed to relax and ESP charges were employed. The cutoff radius was chosen as 18.5 Å for the LJ (Lennard-Jones) potential, and automated temperature control was used. The loading steps were  $1 \times 10^5$ , and the heating cycles were set to 30 with  $1 \times 10^5$  steps per cycle.

**Table S1.** Crystal Data and Structure Refinement results.

| Complex                                                 | <b>1</b>                                                                                                                                                                                                                              | <b>1'</b>                                                                                                                                                                                       |
|---------------------------------------------------------|---------------------------------------------------------------------------------------------------------------------------------------------------------------------------------------------------------------------------------------|-------------------------------------------------------------------------------------------------------------------------------------------------------------------------------------------------|
| Formula                                                 | $\text{C}_8\text{H}_{25}\text{Ag}_6\text{ClN}_{16}\text{O}_7$<br>[Ag <sub>6</sub> Cl(atz) <sub>4</sub> ]OH·6H <sub>2</sub> O<br>[Ag <sub>6</sub> Cl(C <sub>2</sub> N <sub>4</sub> H <sub>3</sub> ) <sub>4</sub> ]OH·6H <sub>2</sub> O | $\text{C}_8\text{H}_{13}\text{Ag}_6\text{ClN}_{16}\text{O}$<br>[Ag <sub>6</sub> Cl(atz) <sub>4</sub> ]OH<br>[Ag <sub>6</sub> Cl(C <sub>2</sub> N <sub>4</sub> H <sub>3</sub> ) <sub>4</sub> ]OH |
| Formula weight                                          | 1140.11                                                                                                                                                                                                                               | 1032.01                                                                                                                                                                                         |
| Temperature (K)                                         | 293(2)                                                                                                                                                                                                                                | 293(2)                                                                                                                                                                                          |
| Crystal system                                          | Tetragonal                                                                                                                                                                                                                            | Tetragonal                                                                                                                                                                                      |
| Space group                                             | <i>I4<sub>1</sub>/amd</i>                                                                                                                                                                                                             | <i>P-4n2</i>                                                                                                                                                                                    |
| <i>a</i> /Å                                             | 29.586(1)                                                                                                                                                                                                                             | 19.347(1)                                                                                                                                                                                       |
| <i>c</i> /Å                                             | 3.4563(2)                                                                                                                                                                                                                             | 3.5013(4)                                                                                                                                                                                       |
| <i>V</i> /Å <sup>3</sup>                                | 3025.4(3)                                                                                                                                                                                                                             | 1310.6(2)                                                                                                                                                                                       |
| <i>Z</i>                                                | 4                                                                                                                                                                                                                                     | 2                                                                                                                                                                                               |
| <i>D<sub>c</sub></i> /g cm <sup>-3</sup> [a]            | 2.503                                                                                                                                                                                                                                 | 2.615                                                                                                                                                                                           |
| <i>D<sub>hf</sub></i> /g cm <sup>-3</sup> [b]           | 2.228                                                                                                                                                                                                                                 | 2.572                                                                                                                                                                                           |
| reflns coll.                                            | 4628                                                                                                                                                                                                                                  | 4750                                                                                                                                                                                            |
| unique reflns                                           | 780                                                                                                                                                                                                                                   | 1299                                                                                                                                                                                            |
| Restraints                                              | 0                                                                                                                                                                                                                                     | 6                                                                                                                                                                                               |
| <i>R<sub>int</sub></i>                                  | 0.0334                                                                                                                                                                                                                                | 0.0649                                                                                                                                                                                          |
| <i>R</i> <sub>1</sub> [ <i>I</i> > 2σ( <i>I</i> )] [c]  | 0.0488                                                                                                                                                                                                                                | 0.1009                                                                                                                                                                                          |
| <i>wR</i> <sub>2</sub> [ <i>I</i> > 2σ( <i>I</i> )] [d] | 0.0967                                                                                                                                                                                                                                | 0.1710                                                                                                                                                                                          |
| <i>R</i> <sub>1</sub> (all data)                        | 0.0543                                                                                                                                                                                                                                | 0.1150                                                                                                                                                                                          |
| <i>wR</i> <sub>2</sub> (all data)                       | 0.1002                                                                                                                                                                                                                                | 0.1779                                                                                                                                                                                          |
| Peak and hole (e Å <sup>-3</sup> )                      | 0.74 and -0.62                                                                                                                                                                                                                        | 0.87 and -0.73                                                                                                                                                                                  |
| Completeness                                            | 0.996                                                                                                                                                                                                                                 | 0.997                                                                                                                                                                                           |
| GOF                                                     | 1.033                                                                                                                                                                                                                                 | 1.039                                                                                                                                                                                           |
| Flack                                                   | —                                                                                                                                                                                                                                     | 0.38(8)                                                                                                                                                                                         |

**Table S1.** (continued). Crystal Data and Structure Refinement results.

| Complex                                                 | <b>2</b>                                                                                                                                                                                                                                 | <b>2'</b>                                                                                                                                                                                          |
|---------------------------------------------------------|------------------------------------------------------------------------------------------------------------------------------------------------------------------------------------------------------------------------------------------|----------------------------------------------------------------------------------------------------------------------------------------------------------------------------------------------------|
| Formula                                                 | $\text{C}_{12}\text{H}_{29}\text{Ag}_6\text{ClN}_{12}\text{O}_7$<br>[Ag <sub>6</sub> Cl(mt看) <sub>4</sub> ]OH·6H <sub>2</sub> O<br>[Ag <sub>6</sub> Cl(C <sub>3</sub> N <sub>3</sub> H <sub>4</sub> ) <sub>4</sub> ]OH·6H <sub>2</sub> O | $\text{C}_{12}\text{H}_{17}\text{Ag}_6\text{ClN}_{12}\text{O}$<br>[Ag <sub>6</sub> Cl(mt看) <sub>4</sub> ]OH<br>[Ag <sub>6</sub> Cl(C <sub>3</sub> N <sub>3</sub> H <sub>4</sub> ) <sub>4</sub> ]OH |
| Formula weight                                          | 1036.14                                                                                                                                                                                                                                  | 1028.05                                                                                                                                                                                            |
| Temperature (K)                                         | 293(2)                                                                                                                                                                                                                                   | 293(2)                                                                                                                                                                                             |
| Crystal system                                          | Tetragonal                                                                                                                                                                                                                               | Tetragonal                                                                                                                                                                                         |
| Space group                                             | <i>I</i> 4 <sub>1</sub> /amd                                                                                                                                                                                                             | <i>I</i> -42d                                                                                                                                                                                      |
| <i>a</i> /Å                                             | 29.415(3)                                                                                                                                                                                                                                | 28.708(3)                                                                                                                                                                                          |
| <i>c</i> /Å                                             | 3.5250(4)                                                                                                                                                                                                                                | 3.5249(3)                                                                                                                                                                                          |
| <i>V</i> /Å <sup>3</sup>                                | 3050.0(7)                                                                                                                                                                                                                                | 2905.1(6)                                                                                                                                                                                          |
| <i>Z</i>                                                | 4                                                                                                                                                                                                                                        | 4                                                                                                                                                                                                  |
| <i>D</i> <sub>c</sub> /g cm <sup>-3</sup> [a]           | 2.474                                                                                                                                                                                                                                    | 2.350                                                                                                                                                                                              |
| <i>D</i> <sub>hf</sub> /g cm <sup>-3</sup> [b]          | 2.201                                                                                                                                                                                                                                    | 2.311                                                                                                                                                                                              |
| reflns coll.                                            | 5474                                                                                                                                                                                                                                     | 5542                                                                                                                                                                                               |
| unique reflns                                           | 796                                                                                                                                                                                                                                      | 1423                                                                                                                                                                                               |
| Restraints                                              | 0                                                                                                                                                                                                                                        | 3                                                                                                                                                                                                  |
| <i>R</i> <sub>int</sub>                                 | 0.0234                                                                                                                                                                                                                                   | 0.0232                                                                                                                                                                                             |
| <i>R</i> <sub>1</sub> [ <i>I</i> > 2σ( <i>I</i> )] [c]  | 0.0341                                                                                                                                                                                                                                   | 0.0545                                                                                                                                                                                             |
| <i>wR</i> <sub>2</sub> [ <i>I</i> > 2σ( <i>I</i> )] [d] | 0.0914                                                                                                                                                                                                                                   | 0.1605                                                                                                                                                                                             |
| <i>R</i> <sub>1</sub> (all data)                        | 0.0408                                                                                                                                                                                                                                   | 0.0619                                                                                                                                                                                             |
| <i>wR</i> <sub>2</sub> (all data)                       | 0.0969                                                                                                                                                                                                                                   | 0.1659                                                                                                                                                                                             |
| Peak and hole (e Å <sup>-3</sup> )                      | 0.51 and -0.76                                                                                                                                                                                                                           | 1.21 and -1.22                                                                                                                                                                                     |
| Completeness                                            | 0.997                                                                                                                                                                                                                                    | 0.993                                                                                                                                                                                              |
| GOF                                                     | 1.059                                                                                                                                                                                                                                    | 1.096                                                                                                                                                                                              |
| Flack                                                   | —                                                                                                                                                                                                                                        | 0.48(4)                                                                                                                                                                                            |

**Table S1.** (continued). Crystal Data and Structure Refinement results.

| Complex                                                 | <b>3</b>                                                                                                                                                                                                                                                | <b>3'</b>                                                                                                                                                                                              |
|---------------------------------------------------------|---------------------------------------------------------------------------------------------------------------------------------------------------------------------------------------------------------------------------------------------------------|--------------------------------------------------------------------------------------------------------------------------------------------------------------------------------------------------------|
| Formula                                                 | C <sub>8</sub> H <sub>25</sub> Ag <sub>6</sub> BrN <sub>16</sub> O <sub>7</sub><br>[Ag <sub>6</sub> Br(atz) <sub>4</sub> ]OH·6H <sub>2</sub> O<br>[Ag <sub>6</sub> Br(C <sub>2</sub> N <sub>4</sub> H <sub>3</sub> ) <sub>4</sub> ]OH·6H <sub>2</sub> O | C <sub>8</sub> H <sub>13</sub> Ag <sub>6</sub> BrN <sub>16</sub> O<br>[Ag <sub>6</sub> Br(atz) <sub>4</sub> ]OH<br>[Ag <sub>6</sub> Br(C <sub>2</sub> N <sub>4</sub> H <sub>3</sub> ) <sub>4</sub> ]OH |
| Formula weight                                          | 1184.57                                                                                                                                                                                                                                                 | 1076.47                                                                                                                                                                                                |
| Temperature (K)                                         | 293(2)                                                                                                                                                                                                                                                  | 293(2)                                                                                                                                                                                                 |
| Crystal system                                          | Tetragonal                                                                                                                                                                                                                                              | Tetragonal                                                                                                                                                                                             |
| Space group                                             | <i>I</i> 4 <sub>1</sub> / <i>amd</i>                                                                                                                                                                                                                    | <i>P</i> -4 <i>n</i> 2                                                                                                                                                                                 |
| <i>a</i> /Å                                             | 29.634(2)                                                                                                                                                                                                                                               | 19.455(2)                                                                                                                                                                                              |
| <i>c</i> /Å                                             | 3.4913(2)                                                                                                                                                                                                                                               | 3.5339(4)                                                                                                                                                                                              |
| <i>V</i> /Å <sup>3</sup>                                | 3065.9(4)                                                                                                                                                                                                                                               | 1337.6(3)                                                                                                                                                                                              |
| <i>Z</i>                                                | 4                                                                                                                                                                                                                                                       | 2                                                                                                                                                                                                      |
| <i>D</i> <sub>c</sub> /g cm <sup>-3</sup> [a]           | 2.566                                                                                                                                                                                                                                                   | 2.673                                                                                                                                                                                                  |
| <i>D</i> <sub>hf</sub> /g cm <sup>-3</sup> [b]          | 2.295                                                                                                                                                                                                                                                   | 2.630                                                                                                                                                                                                  |
| reflns coll.                                            | 10671                                                                                                                                                                                                                                                   | 8653                                                                                                                                                                                                   |
| unique reflns                                           | 798                                                                                                                                                                                                                                                     | 1328                                                                                                                                                                                                   |
| Restraints                                              | 0                                                                                                                                                                                                                                                       | 6                                                                                                                                                                                                      |
| <i>R</i> <sub>int</sub>                                 | 0.0173                                                                                                                                                                                                                                                  | 0.0658                                                                                                                                                                                                 |
| <i>R</i> <sub>1</sub> [ <i>I</i> > 2σ( <i>I</i> )] [c]  | 0.0318                                                                                                                                                                                                                                                  | 0.1017                                                                                                                                                                                                 |
| <i>wR</i> <sub>2</sub> [ <i>I</i> > 2σ( <i>I</i> )] [d] | 0.0926                                                                                                                                                                                                                                                  | 0.2501                                                                                                                                                                                                 |
| <i>R</i> <sub>1</sub> (all data)                        | 0.0335                                                                                                                                                                                                                                                  | 0.1155                                                                                                                                                                                                 |
| <i>wR</i> <sub>2</sub> (all data)                       | 0.0941                                                                                                                                                                                                                                                  | 0.2584                                                                                                                                                                                                 |
| Peak and hole (e Å <sup>-3</sup> )                      | 0.64 and -1.51                                                                                                                                                                                                                                          | 1.62 and -1.50                                                                                                                                                                                         |
| Completeness                                            | 0.999                                                                                                                                                                                                                                                   | 0.996                                                                                                                                                                                                  |
| GOF                                                     | 1.058                                                                                                                                                                                                                                                   | 1.068                                                                                                                                                                                                  |
| Flack                                                   | —                                                                                                                                                                                                                                                       | 0.50(5)                                                                                                                                                                                                |

**Table S1.** (continued). Crystal Data and Structure Refinement results.

| Complex                                                 | <b>4</b>                                                                                                                                                                                              | <b>4'</b>                                                                                                                                                       |
|---------------------------------------------------------|-------------------------------------------------------------------------------------------------------------------------------------------------------------------------------------------------------|-----------------------------------------------------------------------------------------------------------------------------------------------------------------|
| Formula                                                 | $C_{12}H_{29}Ag_6BrN_{12}O_7$<br>[Ag <sub>6</sub> Br(mtz) <sub>4</sub> ]OH·6H <sub>2</sub> O<br>[Ag <sub>6</sub> Br(C <sub>2</sub> N <sub>3</sub> H <sub>4</sub> ) <sub>4</sub> ]OH·6H <sub>2</sub> O | $C_{12}H_{17}Ag_6BrN_{12}O$<br>[Ag <sub>6</sub> Br(mtz) <sub>4</sub> ]OH<br>[Ag <sub>6</sub> Br(C <sub>2</sub> N <sub>3</sub> H <sub>4</sub> ) <sub>4</sub> ]OH |
| Formula weight                                          | 1180.60                                                                                                                                                                                               | 1072.51                                                                                                                                                         |
| Temperature (K)                                         | 293(2)                                                                                                                                                                                                | 293(2)                                                                                                                                                          |
| Crystal system                                          | Tetragonal                                                                                                                                                                                            | Tetragonal                                                                                                                                                      |
| Space group                                             | <i>I4<sub>1</sub>/amd</i>                                                                                                                                                                             | <i>I-42d</i>                                                                                                                                                    |
| <i>a</i> /Å                                             | 29.419(2)                                                                                                                                                                                             | 28.500(3)                                                                                                                                                       |
| <i>c</i> /Å                                             | 3.5564(4)                                                                                                                                                                                             | 3.5383(5)                                                                                                                                                       |
| <i>V</i> /Å <sup>3</sup>                                | 3077.9(6)                                                                                                                                                                                             | 2874.6(8)                                                                                                                                                       |
| <i>Z</i>                                                | 4                                                                                                                                                                                                     | 4                                                                                                                                                               |
| <i>D<sub>c</sub></i> /g cm <sup>-3</sup> [a]            | 2.548                                                                                                                                                                                                 | 2.478                                                                                                                                                           |
| <i>D<sub>hf</sub></i> /g cm <sup>-3</sup> [b]           | 2.277                                                                                                                                                                                                 | 2.429                                                                                                                                                           |
| reflns coll.                                            | 2520                                                                                                                                                                                                  | 2147                                                                                                                                                            |
| unique reflns                                           | 804                                                                                                                                                                                                   | 1164                                                                                                                                                            |
| Restraints                                              | 0                                                                                                                                                                                                     | 52                                                                                                                                                              |
| <i>R<sub>int</sub></i>                                  | 0.1168                                                                                                                                                                                                | 0.1093                                                                                                                                                          |
| <i>R</i> <sub>1</sub> [ <i>I</i> > 2σ( <i>I</i> )] [c]  | 0.0942                                                                                                                                                                                                | 0.1793                                                                                                                                                          |
| <i>wR</i> <sub>2</sub> [ <i>I</i> > 2σ( <i>I</i> )] [d] | 0.2003                                                                                                                                                                                                | 0.3341                                                                                                                                                          |
| <i>R</i> <sub>1</sub> (all data)                        | 0.1573                                                                                                                                                                                                | 0.2386                                                                                                                                                          |
| <i>wR</i> <sub>2</sub> (all data)                       | 0.2405                                                                                                                                                                                                | 0.3731                                                                                                                                                          |
| Peak and hole (e Å <sup>-3</sup> )                      | 0.89/-2.39                                                                                                                                                                                            | 1.53/-1.65                                                                                                                                                      |
| Completeness                                            | 0.998                                                                                                                                                                                                 | 0.982                                                                                                                                                           |
| GOF                                                     | 1.069                                                                                                                                                                                                 | 1.092                                                                                                                                                           |
| Flack                                                   | -                                                                                                                                                                                                     | 0.45(12)                                                                                                                                                        |

<sup>a</sup> The density of the crystal.<sup>b</sup> The density of the host framework.<sup>c</sup>  $R_1 = \sum ||F_o| - |F_c|| / \sum |F_o|$ .<sup>d</sup>  $wR_2 = [\sum w(F_o^2 - F_c^2)^2 / \sum w(F_o^2)^2]^{1/2}$ .

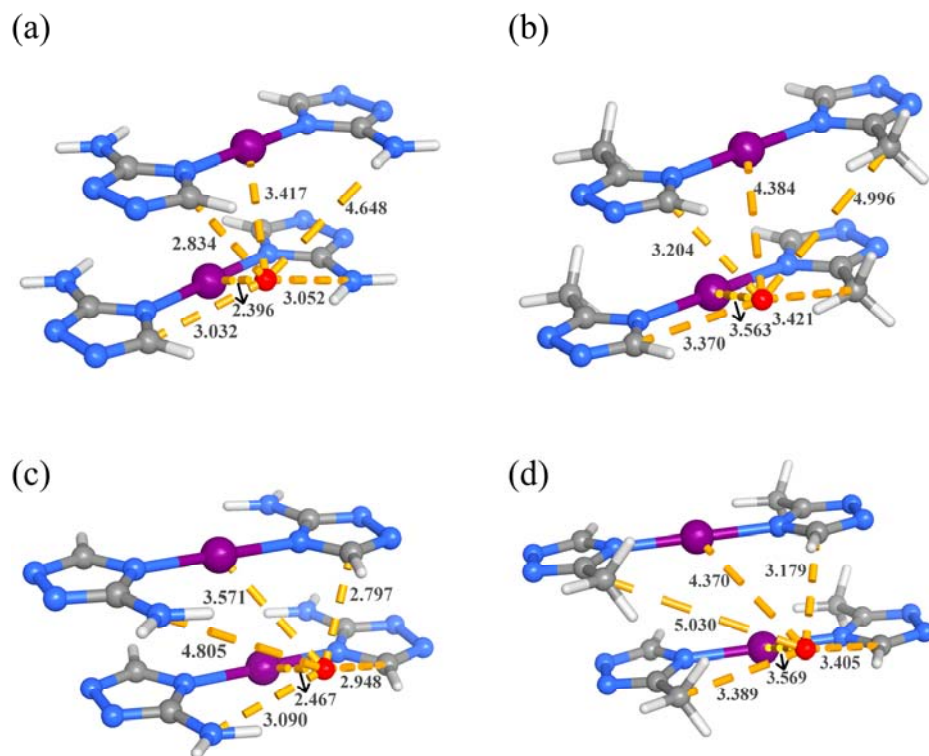

**Fig. S1** The Shortest Ag...O separations in (a) **1**, (b) **2**, (c) **3**, and (d) **4** obtained from computational simulations.

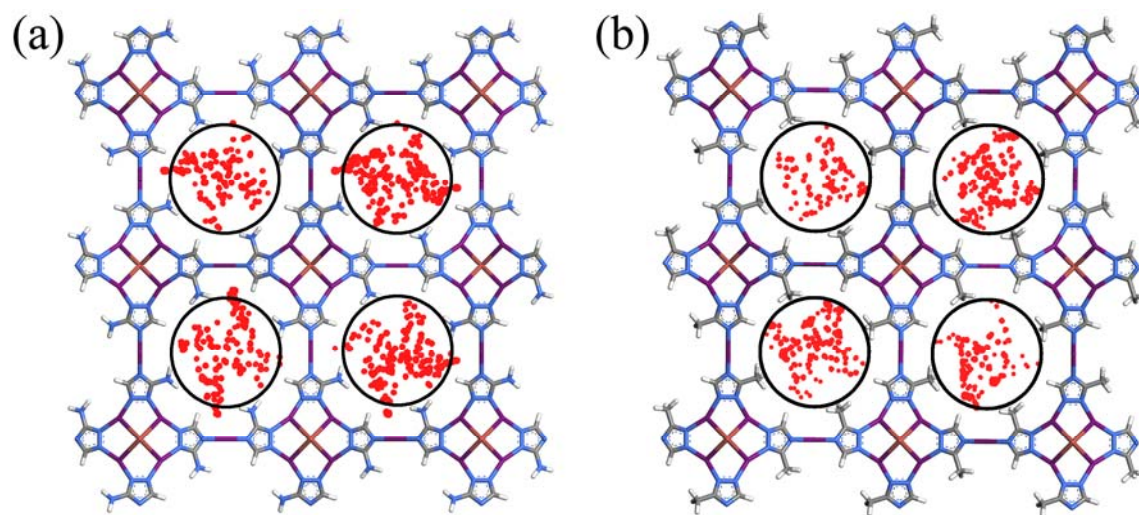

**Fig. S2** Preferred locations of OH<sup>-</sup>/H<sub>2</sub>O in (a) **3** and (b) **4** obtained from computational simulations (red dots with Ag...O distances longer than 3.5 Å are enclosed in black circles).



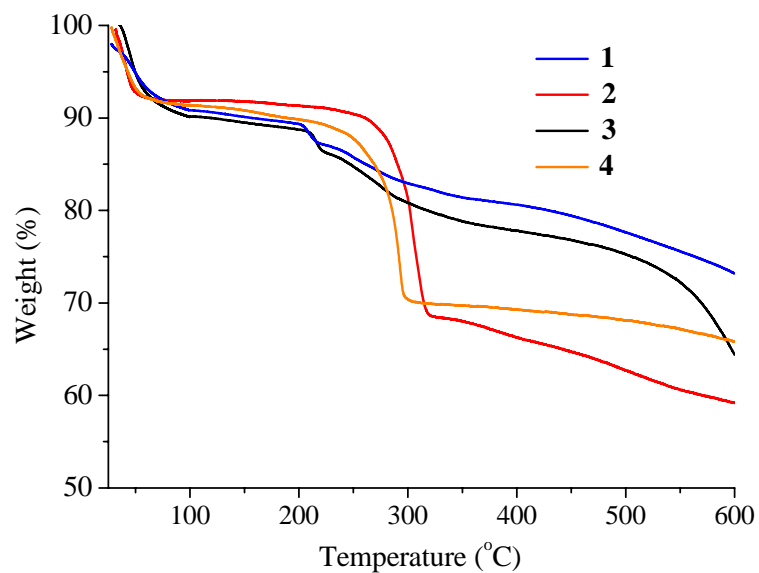

**Fig. S3** TG curves of **1-4**.

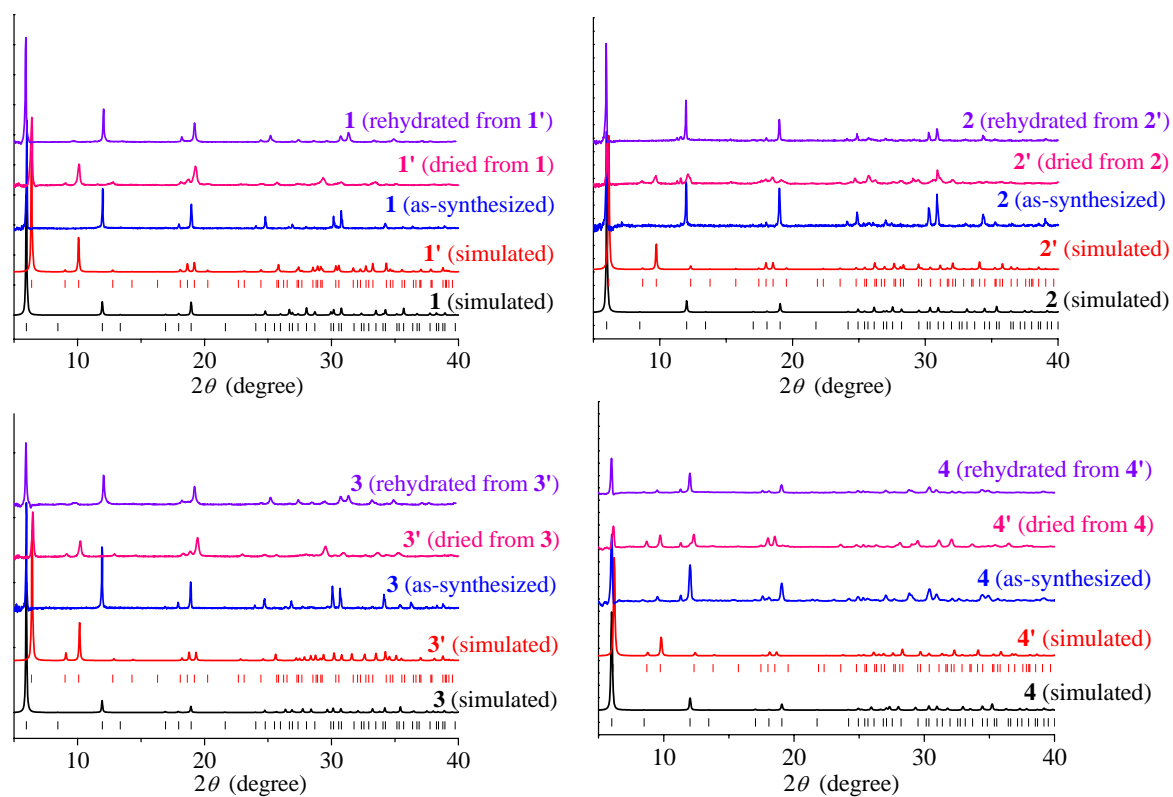

**Fig. S4** PXRD of **1-4** undergoing dried and rehydrated process.

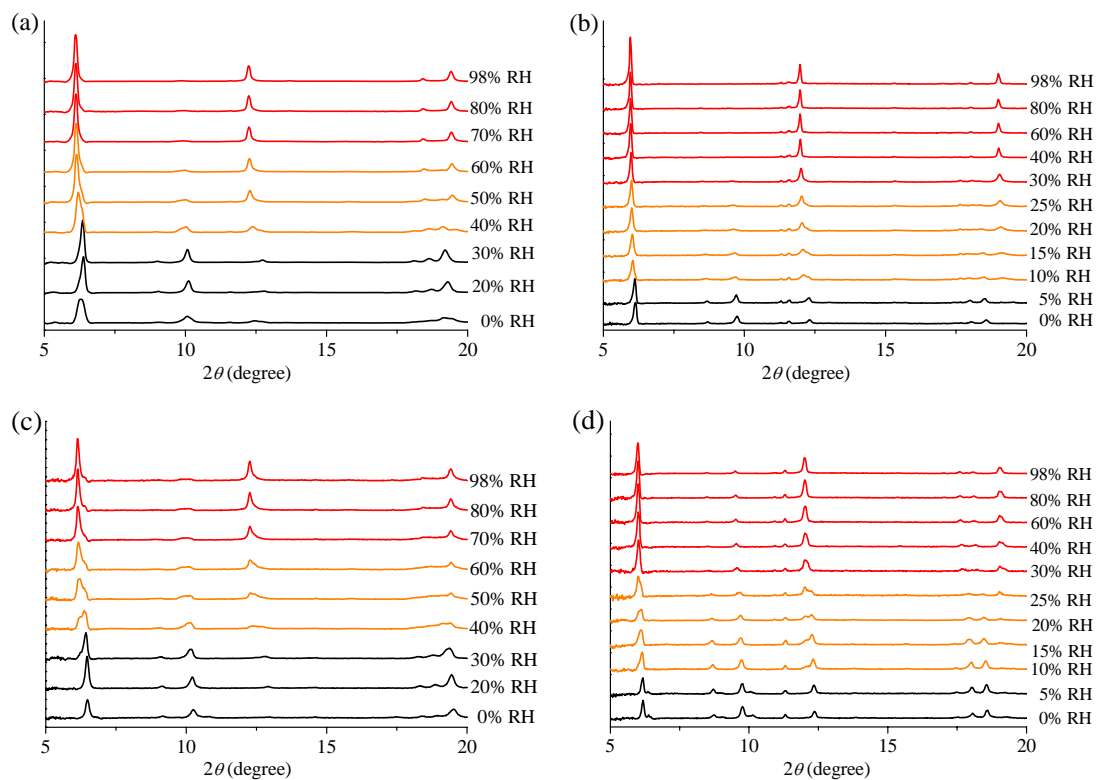

**Fig. S5** Variable-humidity PXRD of (a) **1'**, (b) **2'**, (c) **3'**, and (d) **4'** measured at room temperature.
